# Supplementary material for: CTRP3 induces an intermediate switch of CD14++CD16+ monocyte subset with anti-inflammatory phenotype
Source: PubMed Central journal article supplement — Exp Ther Med. 2020 Jan 23;19(3):2243–51. doi: 10.3892/etm.2020.8467 (PMC7027268; doi:10.3892/etm.2020.8467), 2020-01-23

Figure S1. Representative image of monocytes that were cultivated with DMEM medium supplemented with 10% fetal calf serum, penicillin (100 U/ml), streptomycin (0.1 mg/ml) and glutamine (2 mM) for 48 h. Note that a large proportion of monocytes were adherent, which changed from spherical shapes into a flat, cobblestone morphology, a phenotype synonymous with macrophages. Scale bar, 50  $\mu$ m.

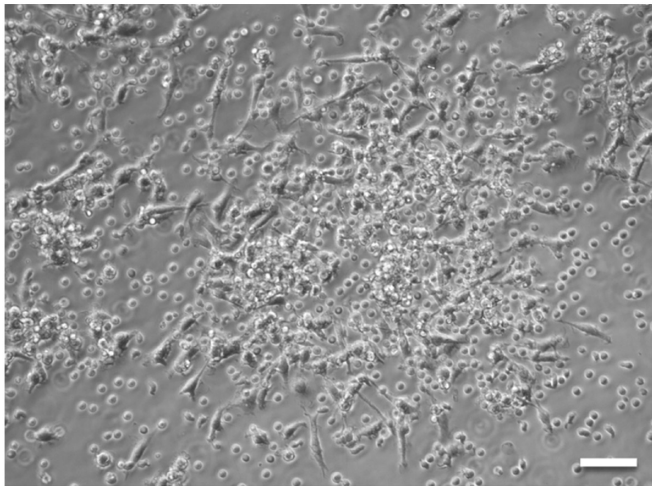

Supplement: Supplementary_Data.pdf [file Supplementary_Data.pdf]
